# Supplementary material
Source: publisher figshare collection journal article supplement (https://frontiersin.figshare.com/ndownloader/files/34600418)
Supplement: Supplementary file [file 34600418]

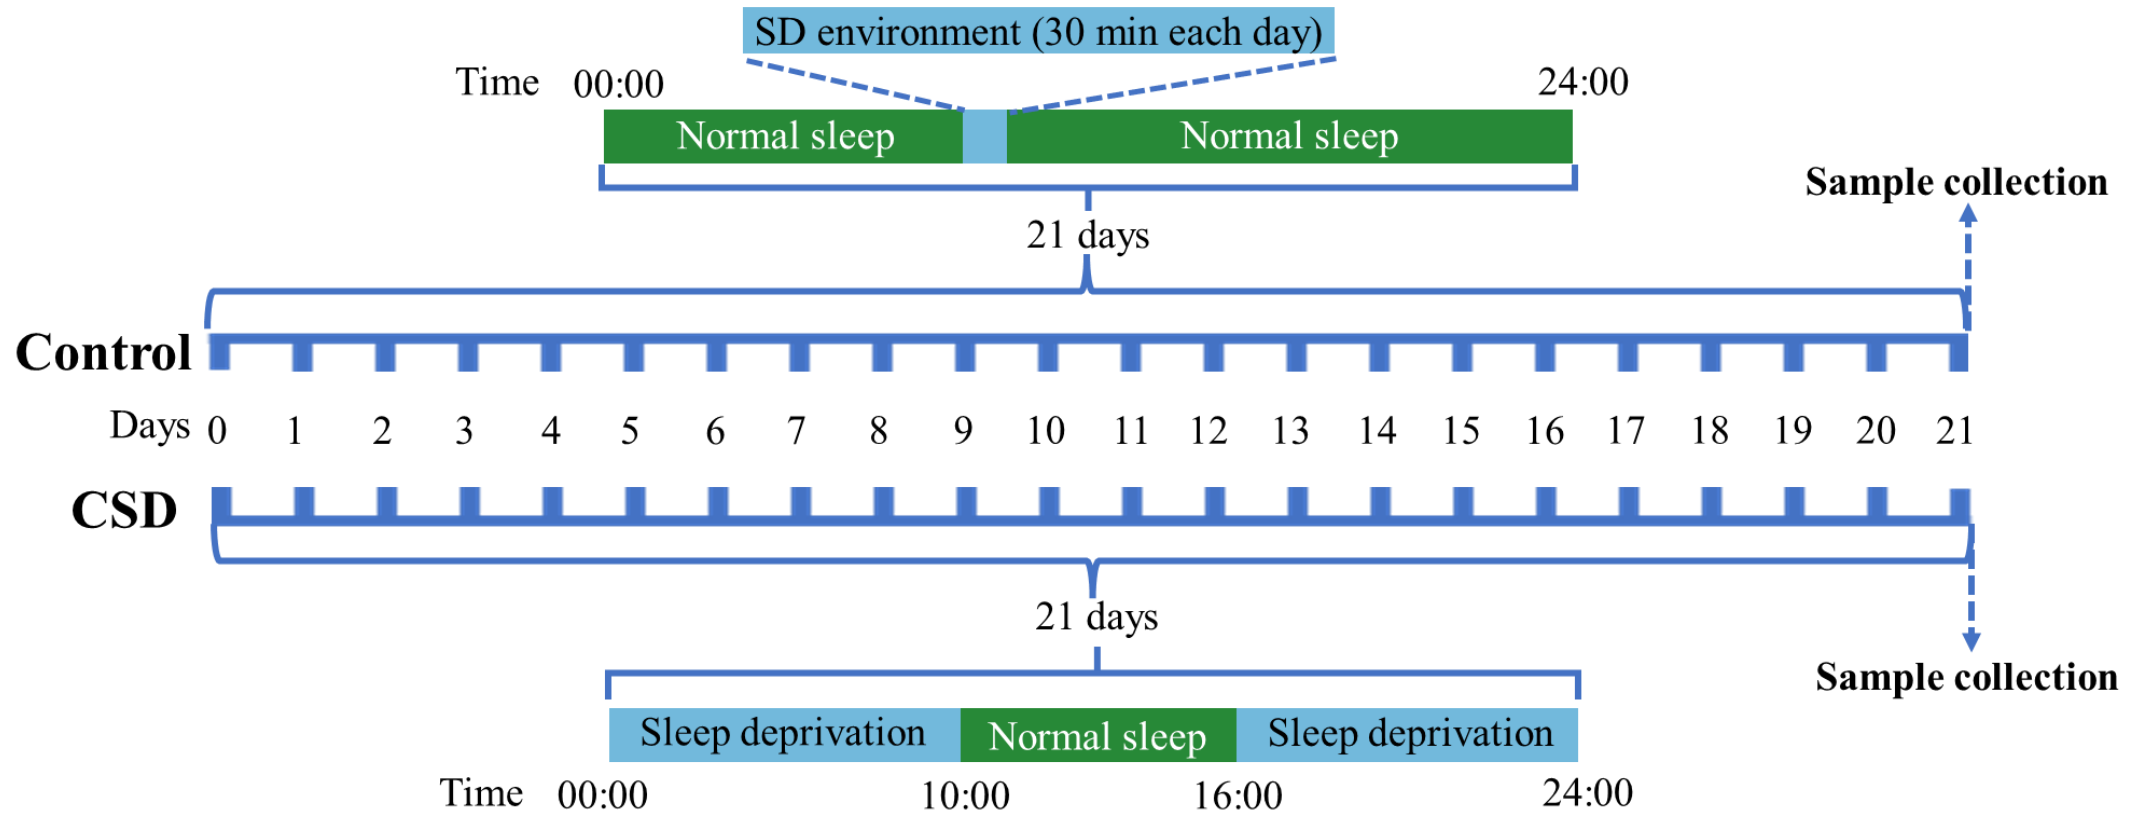

Figure S1. The diagram of the CSD design
